# Supplementary material
Source: PubMed Central journal article supplement (PMC2638894)
Supplement: ern196_1.pdf [file ern196_1.pdf]

Gene Expression and Sensitivity in Response to Copper Stress in Rice Leaves. *Emi Sudo, Misao Itouga, Kayo Yoshida-Hatanaka, Yoshiro Ono, Hitoshi Sakakibara*

**Supplementary Material**

**Table S1.** Expression profiles of all Cu-responsive genes grown with 10, 45 or 130  $\mu\text{M}$  of  $\text{CuCl}_2$ .

| Probe ID                                         | Full length<br>cDNA | Locus_id       | Description <sup>a</sup>                        | Cu 10 $\mu\text{M}$ |                   | Cu 45 $\mu\text{M}$ |      | Cu 130 $\mu\text{M}$ |       | EC50 <sub>F</sub> <sup>d</sup><br>( $\mu\text{M}$ ) | $ \log_2 F _{130}$ <sup>e</sup> |
|--------------------------------------------------|---------------------|----------------|-------------------------------------------------|---------------------|-------------------|---------------------|------|----------------------|-------|-----------------------------------------------------|---------------------------------|
|                                                  |                     |                |                                                 | F <sup>b</sup>      | S.E. <sup>c</sup> | F                   | S.E. | F                    | S.E.  |                                                     |                                 |
| defense (up-regulated)                           |                     |                |                                                 |                     |                   |                     |      |                      |       |                                                     |                                 |
| A_71_P105870                                     | AK060724            | LOC_Os02g41630 | phenylalanine ammonia-lyase                     | 1.02                | 0.13              | 1.70                | 0.99 | 2.01                 | 0.58  | 96.84                                               | 1.01                            |
| A_71_P105867                                     | AK068993            | LOC_Os02g41680 | phenylalanine ammonia-lyase                     | 1.01                | 0.18              | 1.42                | 0.55 | 5.01                 | 2.53  | 66.59                                               | 2.32                            |
| A_71_P105871                                     | AK102817            | LOC_Os02g41630 | phenylalanine ammonia-lyase                     | 1.19                | 0.13              | 1.82                | 0.88 | 2.26                 | 0.50  | 79.62                                               | 1.17                            |
| A_71_P113211                                     | AK067801            | LOC_Os04g43800 | phenylalanine ammonia-lyase                     | 1.34                | 0.69              | 1.78                | 0.80 | 4.61                 | 2.34  | 39.45                                               | 2.20                            |
| A_71_P126860                                     | AK099443            | LOC_Os11g02440 | chalcone-flavonone isomerase                    | 1.38                | 0.22              | 1.89                | 0.67 | 2.19                 | 0.38  | 75.43                                               | 1.13                            |
| A_71_P104485                                     | AK070746            | LOC_Os02g08420 | dihydroflavonol-4-reductase                     | 1.07                | 0.41              | 1.32                | 1.06 | 2.23                 | 1.32  | 116.44                                              | 1.16                            |
| A_71_P119630                                     | AK065515            | LOC_Os08g38910 | caffeoyl-CoA O-methyltransferase 2              | 1.19                | 0.35              | 2.12                | 1.69 | 3.18                 | 1.10  | 50.11                                               | 1.67                            |
| A_71_P115157                                     | AK104994            | LOC_Os05g25640 | trans-cinnamate 4-monooxygenase                 | 1.21                | 0.17              | 1.42                | 0.15 | 2.43                 | 0.25  | 100.41                                              | 1.28                            |
| A_71_P123533                                     | AK069308            | LOC_Os10g02880 | O-methyltransferase ZRP4                        | 1.17                | 0.07              | 1.19                | 0.06 | 4.27                 | 0.87  | 77.19                                               | 2.09                            |
| A_71_P122641                                     | AK072740            | LOC_Os09g17560 | O-methyltransferase ZRP4                        | 1.03                | 0.12              | 1.59                | 0.43 | 21.92                | 10.80 | 44.06                                               | 4.45                            |
| A_71_P111602                                     | AK065090            | LOC_Os04g59190 | peroxidase 2 precursor                          | 1.38                | 0.31              | 1.79                | 0.28 | 7.16                 | 3.19  | 32.57                                               | 2.84                            |
| A_71_P113417                                     | AK106200            | LOC_Os05g04500 | peroxidase 63 precursor                         | 1.62                | 0.26              | 2.97                | 2.84 | 8.13                 | 1.72  | 18.11                                               | 3.02                            |
| A_71_P117837                                     | AK072862            | LOC_Os07g47990 | peroxidase 2 precursor                          | 1.34                | 0.05              | 1.37                | 0.33 | 3.50                 | 1.61  | 65.73                                               | 1.81                            |
| A_71_P103756                                     | AK099241            | LOC_Os01g22370 | peroxidase 1 precursor                          | 1.22                | 0.10              | 1.48                | 0.10 | 4.33                 | 0.59  | 54.26                                               | 2.12                            |
| A_71_P120304                                     | AK069503            | LOC_Os08g02110 | peroxidase 47 precursor                         | 1.20                | 0.17              | 1.31                | 0.42 | 3.30                 | 0.30  | 78.35                                               | 1.72                            |
| A_71_P117839                                     | AK073202            | LOC_Os07g48020 | peroxidase 2 precursor                          | 1.18                | 0.31              | 1.69                | 1.05 | 9.18                 | 5.09  | 39.26                                               | 3.20                            |
| A_71_P103305                                     | AK107822            | LOC_Os01g72170 | glutathione S-transferase                       | 1.21                | 0.11              | 1.24                | 0.21 | 2.07                 | 0.60  | 197.47                                              | 1.05                            |
| A_71_P125246                                     | AK062653            | LOC_Os11g47809 | metallothionein-like protein 1                  | 1.37                | 0.43              | 1.48                | 0.41 | 4.06                 | 2.24  | 50.71                                               | 2.02                            |
| defense (down-regulated)                         |                     |                |                                                 |                     |                   |                     |      |                      |       |                                                     |                                 |
| A_71_P103051                                     | AK103129            | LOC_Os01g53330 | anthocyanidin 5,3-O-glucosyltransferase         | 0.80                | 0.12              | 0.58                | 0.17 | 0.29                 | 0.20  | 52.45                                               | 1.80                            |
| A_71_P119739                                     | AK067868            | LOC_Os08g07880 | phosphopantothenate-cysteine ligase             | 0.61                | 0.06              | 0.48                | 0.06 | 0.43                 | 0.04  | 43.90                                               | 1.23                            |
| A_71_P103162                                     | AK062796            | LOC_Os01g74300 | metallothionein-like protein type 2             | 0.92                | 0.04              | 0.82                | 0.15 | 0.16                 | 0.02  | 63.13                                               | 2.65                            |
| DNA, RNA modification, turnover (up-regulated)   |                     |                |                                                 |                     |                   |                     |      |                      |       |                                                     |                                 |
| A_71_P100611                                     | AK071917            | LOC_Os01g03740 | nuclease PA3                                    | 1.14                | 0.21              | 1.24                | 0.18 | 2.04                 | 0.39  | 171.50                                              | 1.03                            |
| A_71_P103018                                     | AK103534            | LOC_Os01g21420 | pre-mRNA-splicing factor SF2                    | 1.47                | 0.37              | 1.50                | 0.65 | 2.20                 | 0.18  | 132.94                                              | 1.14                            |
| A_71_P103546                                     | AK058891            | LOC_Os01g71690 | recA protein, expressed                         | 1.00                | 0.08              | 1.02                | 0.06 | 2.21                 | 0.26  | 156.14                                              | 1.14                            |
| A_71_P120550                                     | AK058502            | LOC_Os08g33710 | ribonuclease 3 precursor                        | 1.20                | 0.14              | 1.27                | 0.17 | 2.80                 | 0.59  | 99.88                                               | 1.48                            |
| DNA, RNA modification, turnover (down-regulated) |                     |                |                                                 |                     |                   |                     |      |                      |       |                                                     |                                 |
| A_71_P124729                                     | AK103113            | LOC_Os11g04390 | heterogeneous nuclear ribonucleoprotein R       | 0.88                | 0.13              | 0.79                | 0.13 | 0.49                 | 0.17  | 163.01                                              | 1.03                            |
| A_71_P108383                                     | AK100035            | LOC_Os03g55660 | nucleoporin-like protein                        | 0.83                | 0.14              | 0.64                | 0.11 | 0.43                 | 0.13  | 93.44                                               | 1.20                            |
| A_71_P105782                                     | AK067252            | LOC_Os02g57010 | ribonucleoprotein, chloroplast                  | 0.92                | 0.13              | 0.84                | 0.08 | 0.49                 | 0.10  | 167.00                                              | 1.02                            |
| A_71_P126172                                     | AK071898            | LOC_Os12g39380 | transposon protein, putative, Mutator sub-class | 0.72                | 0.16              | 0.66                | 0.21 | 0.47                 | 0.08  | 132.91                                              | 1.10                            |
| A_71_P125725                                     | AK059672            | LOC_Os12g36400 | transposon protein, putative, Pong sub-class    | 0.73                | 0.23              | 0.70                | 0.19 | 0.48                 | 0.16  | 173.28                                              | 1.05                            |
| growth (up-regulated)                            |                     |                |                                                 |                     |                   |                     |      |                      |       |                                                     |                                 |
| A_71_P105893                                     | AK072854            | LOC_Os02g52560 | galactoside 2-alpha-L-fucosyltransferase        | 1.24                | 0.10              | 1.30                | 0.25 | 2.09                 | 0.48  | 177.01                                              | 1.06                            |
| A_71_P101403                                     | AK100475            | LOC_Os01g54620 | CESA4 - cellulose synthase                      | 1.28                | 0.31              | 1.79                | 1.27 | 3.01                 | 0.87  | 55.30                                               | 1.59                            |
| A_71_P126612                                     | AK059860            | LOC_Os12g05260 | phytosulfokines 5 precursor                     | 1.01                | 0.17              | 1.14                | 0.13 | 3.30                 | 0.23  | 96.28                                               | 1.72                            |
| A_71_P108939                                     | AK105970            | LOC_Os03g09230 | xylogen protein 1                               | 1.30                | 0.21              | 1.47                | 0.29 | 3.29                 | 0.72  | 63.90                                               | 1.72                            |

| growth (down-regulated)       |          |                |                                                                              |      |      |      |      |       |      |        |      |
|-------------------------------|----------|----------------|------------------------------------------------------------------------------|------|------|------|------|-------|------|--------|------|
| A_71_P121749                  | AK070937 | LOC_Os09g38768 | cell division control protein 50                                             | 0.87 | 0.11 | 0.84 | 0.23 | 0.49  | 0.05 | 203.94 | 1.02 |
| A_71_P109146                  | AK110743 | LOC_Os03g02830 | cell division control protein 50                                             | 0.73 | 0.11 | 0.63 | 0.05 | 0.48  | 0.12 | 125.46 | 1.06 |
| metabolism (up-regulated)     |          |                |                                                                              |      |      |      |      |       |      |        |      |
| A_71_P123648                  | AK059063 | LOC_Os10g25130 | alanine aminotransferase 2                                                   | 1.05 | 0.05 | 1.32 | 0.17 | 2.69  | 0.89 | 93.98  | 1.43 |
| A_71_P115563                  | AK073364 | LOC_Os06g01760 | aldehyde dehydrogenase                                                       | 1.52 | 0.17 | 1.62 | 0.31 | 3.54  | 0.26 | 43.67  | 1.82 |
| A_71_P124200                  | AK061152 | LOC_Os10g06720 | aldose 1-epimerase                                                           | 1.13 | 0.07 | 1.30 | 0.09 | 2.44  | 0.13 | 111.74 | 1.29 |
| A_71_P105541                  | AK072245 | LOC_Os02g01590 | beta-fructofuranosidase 1 precursor                                          | 1.17 | 0.17 | 1.58 | 0.57 | 7.67  | 3.37 | 43.64  | 2.94 |
| A_71_P125689                  | AK071599 | LOC_Os12g16720 | cytochrome P450 71A1                                                         | 1.25 | 0.11 | 1.57 | 0.21 | 4.31  | 4.17 | 50.04  | 2.11 |
| A_71_P125423                  | AK060292 | LOC_Os11g18570 | cytochrome P450 87A3                                                         | 1.05 | 0.13 | 1.28 | 0.14 | 10.93 | 2.27 | 54.17  | 3.45 |
| A_71_P114901                  | AK061050 | LOC_Os05g33380 | fructose-bisphosphate aldolase cytoplasmic isozyme                           | 1.00 | 0.06 | 1.30 | 0.13 | 2.72  | 0.48 | 92.34  | 1.44 |
| A_71_P108936                  | AK058750 | LOC_Os03g09250 | inositol-3-phosphate synthase                                                | 1.01 | 0.19 | 1.02 | 0.21 | 3.16  | 0.93 | 130.60 | 1.66 |
| A_71_P126555                  | AK066737 | LOC_Os12g37260 | lipooxygenase 2.1, chloroplast precursor                                     | 3.06 | 0.97 | 3.70 | 1.79 | 18.41 | 3.28 | 4.86   | 4.20 |
| A_71_P113429                  | AK062702 | LOC_Os05g07890 | lipase/lipooxygenase, PLAT/LH2                                               | 1.03 | 0.13 | 1.14 | 0.14 | 2.18  | 0.69 | 141.54 | 1.12 |
| A_71_P103578                  | AK105208 | LOC_Os01g62980 | lipid binding protein                                                        | 1.02 | 0.13 | 1.11 | 0.03 | 2.13  | 1.36 | 151.49 | 1.09 |
| A_71_P119251                  | AK060951 | LOC_Os07g09970 | lipid binding protein                                                        | 1.03 | 0.15 | 1.21 | 0.05 | 2.27  | 0.39 | 121.33 | 1.18 |
| A_71_P107746                  | AK061537 | LOC_Os03g57970 | lipid transfer protein                                                       | 1.61 | 0.47 | 3.57 | 1.06 | 5.01  | 0.60 | 17.29  | 2.32 |
| A_71_P125078                  | AK061288 | LOC_Os11g24070 | nonspecific lipid-transfer protein 1 precursor                               | 1.19 | 0.07 | 1.56 | 0.05 | 2.67  | 0.55 | 76.80  | 1.42 |
| A_71_P125472                  | AK058896 | LOC_Os11g02369 | nonspecific lipid-transfer protein 2 precursor                               | 1.64 | 0.43 | 1.79 | 0.26 | 3.58  | 1.84 | 32.98  | 1.84 |
| A_71_P115043                  | AK062463 | LOC_Os05g47700 | nonspecific lipid-transfer protein precursor                                 | 1.57 | 0.08 | 2.13 | 0.35 | 4.72  | 0.46 | 25.88  | 2.24 |
| A_71_P110178                  | AK058876 | LOC_Os03g60090 | methylenetetrahydrofolate reductase                                          | 1.19 | 0.13 | 1.47 | 0.18 | 2.28  | 0.79 | 104.13 | 1.19 |
| A_71_P126897                  | AK065255 | LOC_Os12g42876 | 5-methyltetrahydropteroyltriglutamate-homocysteine methyltransferase         | 1.06 | 0.19 | 1.53 | 0.25 | 2.15  | 0.28 | 100.54 | 1.10 |
| A_71_P112860                  | AK108398 | LOC_Os04g08550 | NAD(P)H-dependent oxidoreductase                                             | 1.23 | 0.10 | 1.61 | 0.11 | 2.64  | 1.30 | 74.03  | 1.40 |
| A_71_P125414                  | AK068268 | LOC_Os11g09280 | OsPDIL1-1 - Oryza sativa protein disulfide isomerase                         | 1.36 | 0.03 | 1.91 | 0.13 | 2.27  | 0.45 | 69.60  | 1.18 |
| A_71_P113641                  | AK105858 | LOC_Os05g46510 | polygalacturonase precursor                                                  | 1.07 | 0.07 | 1.08 | 0.04 | 2.27  | 0.27 | 182.58 | 1.18 |
| A_71_P116988                  | AK072921 | LOC_Os06g42560 | tryptophan synthase beta chain 2                                             | 1.28 | 0.26 | 1.41 | 0.11 | 2.44  | 0.46 | 103.42 | 1.29 |
| metabolism (down-regulated)   |          |                |                                                                              |      |      |      |      |       |      |        |      |
| A_71_P111842                  | AK065943 | LOC_Os04g39140 | acetyltransferase, GNAT family protein                                       | 0.67 | 0.14 | 0.54 | 0.12 | 0.36  | 0.05 | 46.86  | 1.49 |
| A_71_P124627                  | AK101288 | LOC_Os11g10520 | alcohol dehydrogenase 2                                                      | 0.86 | 0.11 | 0.81 | 0.12 | 0.36  | 0.07 | 105.28 | 1.48 |
| A_71_P105654                  | AK060824 | LOC_Os02g43280 | aldehyde dehydrogenase 3B1                                                   | 0.94 | 0.04 | 0.81 | 0.03 | 0.44  | 0.02 | 124.39 | 1.19 |
| A_71_P120663                  | AK072163 | LOC_Os08g43390 | cytochrome P450 78A3                                                         | 0.77 | 0.04 | 0.56 | 0.03 | 0.15  | 0.02 | 36.47  | 2.72 |
| A_71_P103251                  | AK067866 | LOC_Os01g01120 | E-1 enzyme                                                                   | 0.80 | 0.10 | 0.51 | 0.10 | 0.30  | 0.06 | 47.92  | 1.73 |
| A_71_P122533                  | AK059603 | LOC_Os09g15810 | fold bifunctional protein                                                    | 0.78 | 0.19 | 0.61 | 0.29 | 0.38  | 0.16 | 71.44  | 1.38 |
| A_71_P120134                  | AK110716 | LOC_Os08g37940 | HAD-superfamily hydrolase subfamily IA, variant 3                            | 0.99 | 0.26 | 0.80 | 0.19 | 0.22  | 0.13 | 76.47  | 2.16 |
| A_71_P115741                  | AK065263 | LOC_Os06g08090 | heparanase-like protein 3 precursor                                          | 0.95 | 0.43 | 0.85 | 0.35 | 0.36  | 0.07 | 107.33 | 1.47 |
| A_71_P106091                  | AK070107 | LOC_Os02g07350 | inositol-1-monophosphatase                                                   | 0.87 | 0.16 | 0.81 | 0.11 | 0.45  | 0.04 | 148.69 | 1.15 |
| A_71_P109112                  | AK067323 | LOC_Os07g46310 | magnesium-chelatase subunit H                                                | 0.84 | 0.07 | 0.78 | 0.07 | 0.33  | 0.09 | 89.09  | 1.60 |
| A_71_P118096                  | AK112115 | LOC_Os07g37840 | monoglyceride lipase                                                         | 0.65 | 0.05 | 0.62 | 0.10 | 0.44  | 0.04 | 100.64 | 1.17 |
| A_71_P113163                  | AK066522 | LOC_Os04g41340 | 4-nitrophenylphosphatase                                                     | 0.85 | 0.32 | 0.76 | 0.23 | 0.35  | 0.16 | 91.38  | 1.51 |
| A_71_P107837                  | AK065869 | LOC_Os03g49510 | phosphatidylinositol-4-phosphate 5-kinase 1 precursor                        | 0.76 | 0.05 | 0.75 | 0.01 | 0.50  | 0.02 | 230.66 | 1.01 |
| A_71_P124495                  | AK068167 | LOC_Os11g05260 | phosphoglycerate mutase                                                      | 0.67 | 0.02 | 0.52 | 0.02 | 0.40  | 0.04 | 52.78  | 1.32 |
| A_71_P105465                  | AK105848 | LOC_Os02g06480 | protein SCO1, mitochondrial precursor                                        | 0.96 | 0.33 | 0.88 | 0.34 | 0.42  | 0.07 | 130.05 | 1.27 |
| photosynthesis (up-regulated) |          |                |                                                                              |      |      |      |      |       |      |        |      |
| A_71_P114297                  | AK100910 | LOC_Os05g50380 | glucose-1-phosphate adenylyltransferase large subunit, chloroplast precursor | 1.39 | 0.13 | 1.47 | 0.18 | 3.93  | 1.21 | 51.53  | 1.98 |
| A_71_P116411                  | AK101836 | LOC_Os06g49110 | delta-aminolevulinic acid dehydratase, chloroplast                           | 1.39 | 0.21 | 1.73 | 0.11 | 2.03  | 0.20 | 113.80 | 1.02 |

|                                   |          |                | precursor                                                                         |      |      |      |      |      |      |        |      |  |
|-----------------------------------|----------|----------------|-----------------------------------------------------------------------------------|------|------|------|------|------|------|--------|------|--|
| photosynthesis (down-regulated)   |          |                |                                                                                   |      |      |      |      |      |      |        |      |  |
| A_71_P105099                      | AK062994 | LOC_Os02g51470 | ATP synthase delta chain, chloroplast precursor                                   | 0.96 | 0.16 | 0.87 | 0.08 | 0.45 | 0.10 | 140.05 | 1.15 |  |
| A_71_P115841                      | AK060904 | LOC_Os06g21590 | chlorophyll a-b binding protein 6A, chloroplast precursor                         | 0.81 | 0.13 | 0.71 | 0.09 | 0.48 | 0.08 | 143.52 | 1.05 |  |
| A_71_P125058                      | AK061295 | LOC_Os11g13890 | chlorophyll a-b binding protein M9, chloroplast precursor                         | 0.70 | 0.13 | 0.63 | 0.11 | 0.37 | 0.11 | 66.63  | 1.44 |  |
| A_71_P118301                      | AK109399 | LOC_Os07g37550 | chlorophyll a-b binding protein of LHClI type III, chloroplast precursor          | 0.69 | 0.11 | 0.58 | 0.06 | 0.40 | 0.11 | 64.58  | 1.32 |  |
| A_71_P121584                      | AK109203 | LOC_Os09g32620 | chloroplastic quinone-oxidoreductase                                              | 0.76 | 0.23 | 0.73 | 0.21 | 0.48 | 0.06 | 179.46 | 1.05 |  |
| A_71_P101901                      | AK066307 | LOC_Os12g10604 | cytochrome b/b6/petB family protein                                               | 0.61 | 0.10 | 0.54 | 0.06 | 0.32 | 0.11 | 34.08  | 1.66 |  |
| A_71_P126393                      | AK059037 | LOC_Os12g08770 | photosystem I reaction center subunit N, chloroplast precursor                    | 0.73 | 0.08 | 0.67 | 0.07 | 0.40 | 0.14 | 89.00  | 1.33 |  |
| A_71_P114565                      | AK066345 | LOC_Os05g43310 | photosystem II reaction center W protein, chloroplast precursor                   | 0.76 | 0.13 | 0.76 | 0.06 | 0.40 | 0.06 | 116.26 | 1.32 |  |
| A_71_P108389                      | AK058858 | LOC_Os03g55720 | plastoquinol-plastocyanin reductase                                               | 0.94 | 0.10 | 0.73 | 0.08 | 0.36 | 0.25 | 87.68  | 1.47 |  |
| A_71_P117917                      | AK069170 | LOC_Os07g36080 | oxygen-evolving enhancer protein 3-1, chloroplast precursor                       | 0.93 | 0.09 | 0.80 | 0.05 | 0.30 | 0.12 | 84.61  | 1.76 |  |
| A_71_P117916                      | AK058793 | LOC_Os07g36080 | oxygen-evolving enhancer protein 3-1, chloroplast precursor                       | 0.70 | 0.05 | 0.61 | 0.05 | 0.29 | 0.20 | 48.08  | 1.77 |  |
| A_71_P120166                      | AK058551 | LOC_Os08g25734 | glucose-1-phosphate adenylyltransferase small subunit, chloroplast precursor      | 0.86 | 0.20 | 0.84 | 0.16 | 0.47 | 0.15 | 191.25 | 1.08 |  |
| A_71_P124217                      | AK110705 | LOC_Os06g39730 | ribulose biphosphate carboxylase large chain, catalytic domain containing protein | 0.76 | 0.27 | 0.73 | 0.13 | 0.50 | 0.12 | 203.68 | 1.01 |  |
| protein turnover (up-regulated)   |          |                |                                                                                   |      |      |      |      |      |      |        |      |  |
| A_71_P123176                      | AK059434 | LOC_Os10g27190 | 40S ribosomal protein S17-4                                                       | 1.50 | 0.06 | 1.81 | 0.09 | 2.22 | 0.22 | 76.61  | 1.15 |  |
| A_71_P112526                      | AK068012 | LOC_Os04g27860 | 40S ribosomal protein S27                                                         | 1.18 | 0.06 | 1.57 | 0.04 | 2.03 | 0.22 | 117.84 | 1.02 |  |
| A_71_P103250                      | AK059844 | LOC_Os01g01060 | 40S ribosomal protein S5                                                          | 1.33 | 0.10 | 1.82 | 0.14 | 2.05 | 0.33 | 97.08  | 1.03 |  |
| A_71_P121513                      | AK064936 | LOC_Os09g31180 | 60S ribosomal protein L9                                                          | 1.11 | 0.03 | 1.64 | 0.07 | 2.13 | 0.32 | 97.20  | 1.09 |  |
| A_71_P124974                      | AK061884 | LOC_Os11g08100 | aspartic proteinase Asp1 precursor                                                | 1.33 | 0.26 | 1.64 | 0.78 | 2.18 | 0.76 | 99.43  | 1.12 |  |
| A_71_P121730                      | AK105666 | LOC_Os09g30414 | aspartic proteinase nepenthesin-2 precursor                                       | 1.03 | 0.20 | 1.68 | 0.21 | 3.02 | 0.72 | 71.77  | 1.59 |  |
| A_71_P101377                      | AK067257 | LOC_Os01g03340 | Bowman-Birk type bran trypsin inhibitor precursor                                 | 1.38 | 0.12 | 1.50 | 0.12 | 6.98 | 1.77 | 38.00  | 2.80 |  |
| A_71_P101369                      | AK070467 | LOC_Os01g03310 | Bowman-Birk type bran trypsin inhibitor precursor                                 | 1.11 | 0.45 | 1.55 | 0.46 | 3.70 | 1.50 | 62.48  | 1.89 |  |
| A_71_P107682                      | AK061464 | LOC_Os03g08020 | elongation factor 1-alpha                                                         | 1.10 | 0.07 | 1.60 | 0.06 | 2.09 | 0.20 | 103.08 | 1.06 |  |
| A_71_P111054                      | AK105112 | LOC_Os04g35140 | subtilisin-like protease precursor                                                | 1.14 | 0.13 | 1.26 | 0.04 | 3.06 | 0.80 | 91.20  | 1.61 |  |
| protein turnover (down-regulated) |          |                |                                                                                   |      |      |      |      |      |      |        |      |  |
| A_71_P118909                      | AK062438 | LOC_Os07g36940 | eukaryotic translation initiation factor 4G                                       | 0.94 | 0.10 | 0.76 | 0.20 | 0.04 | 0.01 | 44.15  | 4.75 |  |
| A_71_P124668                      | AK103461 | LOC_Os11g10750 | serine carboxypeptidase F13S12.6 precursor                                        | 0.68 | 0.08 | 0.64 | 0.04 | 0.50 | 0.11 | 186.29 | 1.00 |  |
| A_71_P116063                      | AK105959 | LOC_Os06g15400 | threonine endopeptidase                                                           | 0.89 | 0.06 | 0.69 | 0.03 | 0.28 | 0.02 | 67.60  | 1.85 |  |
| A_71_P100229                      | AK065381 | LOC_Os01g12950 | ubiquitin-conjugating enzyme                                                      | 0.72 | 0.03 | 0.69 | 0.07 | 0.50 | 0.09 | 197.99 | 1.01 |  |
| A_71_P118288                      | AK070524 | LOC_Os07g07240 | ubiquitin-conjugating enzyme E2-17 kDa                                            | 0.88 | 0.33 | 0.77 | 0.31 | 0.49 | 0.03 | 156.61 | 1.02 |  |
| A_71_P111814                      | AK058755 | LOC_Os04g58800 | ubiquitin-conjugating enzyme spm2                                                 | 0.75 | 0.08 | 0.60 | 0.01 | 0.32 | 0.02 | 54.81  | 1.65 |  |
| response to stress (up-regulated) |          |                |                                                                                   |      |      |      |      |      |      |        |      |  |
| A_71_P112980                      | AK100788 | LOC_Os04g34600 | ABA/WDS induced protein                                                           | 1.47 | 0.04 | 1.88 | 0.19 | 2.17 | 0.22 | 75.04  | 1.12 |  |
| A_71_P115472                      | AK107775 | LOC_Os06g07030 | dehydration responsive element binding protein                                    | 1.17 | 0.21 | 1.64 | 0.45 | 4.35 | 0.15 | 51.96  | 2.12 |  |
| A_71_P126985                      | AK062422 | LOC_Os09g35010 | dehydration-responsive element-binding protein 1B                                 | 1.24 | 0.38 | 1.86 | 1.59 | 2.27 | 0.57 | 75.69  | 1.18 |  |
| A_71_P118699                      | AK106022 | LOC_Os07g44250 | disease resistance response protein 206                                           | 1.08 | 0.27 | 1.40 | 0.19 | 3.35 | 0.77 | 74.67  | 1.74 |  |
| A_71_P111503                      | AK071013 | LOC_Os04g41680 | endochitinase A precursor                                                         | 1.09 | 0.10 | 1.14 | 0.26 | 2.45 | 0.37 | 140.75 | 1.29 |  |

|                                      |          |                |                                                                              |      |      |      |      |       |      |        |      |
|--------------------------------------|----------|----------------|------------------------------------------------------------------------------|------|------|------|------|-------|------|--------|------|
| A_71_P114512                         | AK060312 | LOC_Os05g42230 | ER6 protein                                                                  | 1.03 | 0.02 | 1.16 | 0.08 | 2.37  | 0.12 | 125.23 | 1.24 |
| A_71_P124122                         | AK065000 | LOC_Os10g22520 | glucan 1,3-beta-glucosidase precursor                                        | 1.14 | 0.49 | 1.40 | 0.28 | 4.57  | 3.06 | 60.04  | 2.19 |
| A_71_P121735                         | AK061896 | LOC_Os09g30418 | heat shock protein 81-3                                                      | 1.37 | 0.05 | 1.78 | 0.16 | 2.39  | 0.20 | 69.90  | 1.26 |
| A_71_P126129                         | AK066682 | LOC_Os12g14440 | jasmonate-induced protein                                                    | 1.63 | 0.84 | 1.99 | 1.18 | 11.92 | 7.51 | 21.62  | 3.58 |
| A_71_P103425                         | AK062520 | LOC_Os01g24710 | salt stress-induced protein                                                  | 1.16 | 0.29 | 1.28 | 0.04 | 6.20  | 0.97 | 56.61  | 2.63 |
| A_71_P114369                         | AK070138 | LOC_Os05g28740 | universal stress protein                                                     | 1.54 | 0.22 | 1.55 | 0.44 | 2.54  | 0.71 | 76.95  | 1.34 |
| A_71_P114262                         | AK065866 | LOC_Os05g15770 | xylanase inhibitor protein 2 precursor                                       | 2.01 | 0.27 | 2.09 | 0.68 | 4.34  | 0.89 | 14.42  | 2.12 |
| A_71_P114261                         | AK062114 | LOC_Os05g15770 | xylanase inhibitor protein 2 precursor                                       | 1.66 | 0.38 | 2.01 | 0.50 | 4.20  | 0.65 | 25.71  | 2.07 |
| response to stress (down-regulated)  |          |                |                                                                              |      |      |      |      |       |      |        |      |
| A_71_P117292                         | AK099477 | LOC_Os06g47800 | disease resistance protein RGA3                                              | 0.77 | 0.08 | 0.61 | 0.06 | 0.27  | 0.03 | 50.42  | 1.87 |
| A_71_P118794                         | AK065027 | LOC_Os07g01630 | disease resistance response protein 206                                      | 0.95 | 0.06 | 0.77 | 0.15 | 0.49  | 0.09 | 131.32 | 1.03 |
| A_71_P122593                         | AK060664 | LOC_Os09g37600 | erwinia induced protein 1                                                    | 0.94 | 0.05 | 0.76 | 0.04 | 0.43  | 0.05 | 111.86 | 1.20 |
| signal transduction (up-regulated)   |          |                |                                                                              |      |      |      |      |       |      |        |      |
| A_71_P100175                         | AK067217 | LOC_Os01g16030 | ADP-ribosylation factor                                                      | 1.04 | 0.15 | 1.65 | 0.62 | 3.11  | 0.79 | 70.94  | 1.64 |
| A_71_P100901                         | AK065589 | LOC_Os01g10890 | CBL-interacting serine/threonine-protein kinase 15                           | 1.45 | 0.65 | 1.61 | 0.41 | 2.80  | 0.59 | 61.28  | 1.49 |
| A_71_P103829                         | AK106774 | LOC_Os01g61610 | gibberellin 20 oxidase 2                                                     | 1.19 | 0.15 | 1.21 | 0.23 | 4.66  | 1.77 | 69.66  | 2.22 |
| A_71_P107599                         | AK107136 | LOC_Os03g57640 | gibberellin receptor GID1L2                                                  | 1.13 | 0.47 | 1.38 | 0.39 | 2.07  | 0.71 | 130.39 | 1.05 |
| A_71_P126794                         | AK061124 | LOC_Os12g04150 | gibberellin receptor GID1L2                                                  | 1.22 | 0.23 | 1.24 | 0.28 | 2.47  | 0.34 | 131.52 | 1.30 |
| A_71_P115134                         | AK067214 | LOC_Os05g31620 | polcalcine Jun o 2                                                           | 1.03 | 0.23 | 1.99 | 1.04 | 2.15  | 0.36 | 82.09  | 1.11 |
| A_71_P112687                         | AK102285 | LOC_Os04g44910 | protein kinase                                                               | 1.21 | 0.12 | 1.31 | 0.10 | 2.64  | 0.29 | 102.14 | 1.40 |
| A_71_P117228                         | AK071637 | LOC_Os06g48300 | protein phosphatase 2C isoform epsilon                                       | 1.00 | 0.02 | 1.15 | 0.09 | 4.35  | 1.72 | 84.94  | 2.12 |
| A_71_P106481                         | AK111620 | LOC_Os02g13510 | receptor-like protein kinase 5 precursor                                     | 1.12 | 0.18 | 1.18 | 0.18 | 2.14  | 0.93 | 169.85 | 1.10 |
| A_71_P116780                         | AK105608 | LOC_Os06g30130 | serine/threonine-protein kinase receptor precursor                           | 1.08 | 0.17 | 1.24 | 0.13 | 2.03  | 0.28 | 152.74 | 1.02 |
| A_71_P102359                         | AK103756 | LOC_Os01g07376 | thioredoxin H-type                                                           | 1.10 | 0.03 | 1.12 | 0.09 | 2.26  | 0.23 | 176.16 | 1.18 |
| signal transduction (down-regulated) |          |                |                                                                              |      |      |      |      |       |      |        |      |
| A_71_P117489                         | AK069024 | LOC_Os06g16330 | BRASSINOSTEROID INSENSITIVE 1-associated receptor kinase 1 precursor         | 0.78 | 0.09 | 0.67 | 0.10 | 0.48  | 0.03 | 134.97 | 1.06 |
| A_71_P102248                         | AK102319 | LOC_Os01g43100 | catalytic/ protein phosphatase type 2C/ protein serine/threonine phosphatase | 0.84 | 0.06 | 0.78 | 0.06 | 0.48  | 0.09 | 168.14 | 1.07 |
| A_71_P109574                         | AK066541 | LOC_Os03g22050 | CBL-interacting serine/threonine-protein kinase 15                           | 0.88 | 0.05 | 0.79 | 0.08 | 0.44  | 0.08 | 131.33 | 1.19 |
| A_71_P128395                         | AK111510 | LOC_Os03g43440 | CBL-interacting serine/threonine-protein kinase 15                           | 0.99 | 0.17 | 0.89 | 0.03 | 0.43  | 0.04 | 125.53 | 1.22 |
| A_71_P118457                         | AK111594 | LOC_Os07g43560 | CRK10                                                                        | 0.66 | 0.07 | 0.60 | 0.07 | 0.26  | 0.02 | 39.45  | 1.93 |
| A_71_P118458                         | AK111564 | LOC_Os07g43570 | CRK10                                                                        | 0.91 | 0.10 | 0.76 | 0.08 | 0.50  | 0.05 | 145.55 | 1.01 |
| A_71_P118483                         | AK062716 | LOC_Os07g42730 | EF hand family protein                                                       | 0.97 | 0.11 | 0.64 | 0.17 | 0.35  | 0.08 | 77.31  | 1.53 |
| A_71_P117941                         | AK106266 | LOC_Os07g06880 | gibberellin receptor GID1L2                                                  | 0.80 | 0.08 | 0.62 | 0.05 | 0.47  | 0.02 | 102.77 | 1.10 |
| A_71_P102150                         | AK099645 | LOC_Os01g07090 | protein phosphatase 2C homolog 7                                             | 0.62 | 0.17 | 0.52 | 0.12 | 0.40  | 0.12 | 45.25  | 1.31 |
| A_71_P103687                         | AK060605 | LOC_Os01g70410 | receptor protein kinase CRINKLY4 precursor                                   | 0.85 | 0.21 | 0.79 | 0.18 | 0.47  | 0.18 | 163.88 | 1.09 |
| A_71_P108152                         | AK107160 | LOC_Os03g61310 | receptor-like protein kinase                                                 | 0.73 | 0.02 | 0.67 | 0.12 | 0.48  | 0.08 | 144.42 | 1.07 |
| A_71_P126328                         | AK069697 | LOC_Os12g39630 | serine/threonine-protein kinase SAPK9                                        | 0.85 | 0.26 | 0.71 | 0.06 | 0.48  | 0.02 | 133.71 | 1.05 |
| transcription (up-regulated)         |          |                |                                                                              |      |      |      |      |       |      |        |      |
| A_71_P108394                         | AK105625 | LOC_Os03g55590 | DNA binding protein                                                          | 1.34 | 0.18 | 2.07 | 0.63 | 2.32  | 0.64 | 60.31  | 1.22 |
| A_71_P100096                         | AK107461 | LOC_Os01g16810 | DNA binding protein                                                          | 1.05 | 0.10 | 1.07 | 0.09 | 2.30  | 0.33 | 171.75 | 1.20 |
| A_71_P118965                         | AK073876 | LOC_Os07g48550 | NAC domain-containing protein 21/22                                          | 1.01 | 0.18 | 1.08 | 0.14 | 4.89  | 1.26 | 89.63  | 2.29 |
| A_71_P105714                         | AK108454 | LOC_Os02g34970 | NAC domain-containing protein 78                                             | 1.04 | 0.25 | 1.28 | 0.10 | 2.87  | 0.86 | 92.62  | 1.52 |
| A_71_P114849                         | AK109568 | LOC_Os05g50610 | OsWRKY8v2 - Superfamily of rice TFs having WRKY and zinc finger domains      | 1.32 | 0.35 | 1.35 | 0.61 | 2.55  | 0.63 | 106.17 | 1.35 |
| A_71_P103952                         | AK062581 | LOC_Os01g69830 | teosinte glume architecture 1                                                | 1.01 | 0.32 | 1.20 | 0.48 | 2.33  | 0.75 | 110.12 | 1.22 |
| A_71_P103396                         | AK064334 | LOC_Os01g63980 | TRANSPARENT TESTA 1 protein                                                  | 1.10 | 0.02 | 1.19 | 0.08 | 2.24  | 0.40 | 147.77 | 1.17 |
| transcription (down-regulated)       |          |                |                                                                              |      |      |      |      |       |      |        |      |

|                               |          |                |                                                                |      |      |      |      |      |      |        |      |
|-------------------------------|----------|----------------|----------------------------------------------------------------|------|------|------|------|------|------|--------|------|
| A_71_P118455                  | AK070963 | LOC_Os07g43530 | amelogenin precursor like protein                              | 0.54 | 0.20 | 0.35 | 0.14 | 0.32 | 0.18 | 12.43  | 1.66 |
| A_71_P106994                  | AK058932 | LOC_Os02g47560 | DNA-binding protein SMUBP-2                                    | 0.48 | 0.14 | 0.39 | 0.08 | 0.35 | 0.04 | 6.96   | 1.53 |
| A_71_P102267                  | AK067244 | LOC_Os01g24070 | GATA transcription factor 22                                   | 0.85 | 0.22 | 0.72 | 0.25 | 0.30 | 0.06 | 72.53  | 1.74 |
| A_71_P113135                  | AK068202 | LOC_Os04g19684 | methyl-CpG binding domain containing protein                   | 0.63 | 0.06 | 0.56 | 0.05 | 0.44 | 0.05 | 67.35  | 1.20 |
| A_71_P105103                  | AK065868 | LOC_Os02g51450 | mTERF family protein                                           | 0.78 | 0.14 | 0.69 | 0.11 | 0.44 | 0.11 | 112.79 | 1.19 |
| A_71_P120363                  | AK105596 | LOC_Os08g10080 | NAC domain-containing protein 21/22                            | 0.86 | 0.51 | 0.60 | 0.11 | 0.38 | 0.15 | 72.85  | 1.41 |
| A_71_P109284                  | AK060225 | LOC_Os03g29970 | nuclear transcription factor Y subunit B-3                     | 0.94 | 0.14 | 0.86 | 0.09 | 0.42 | 0.09 | 129.52 | 1.26 |
| A_71_P114145                  | AK070489 | LOC_Os05g42130 | protein MONOCULUM 1                                            | 0.98 | 0.36 | 0.84 | 0.27 | 0.33 | 0.14 | 96.85  | 1.60 |
| A_71_P112651                  | AK066752 | LOC_Os04g50100 | RING-H2 finger protein ATLSG                                   | 0.62 | 0.08 | 0.58 | 0.09 | 0.38 | 0.02 | 51.45  | 1.41 |
| A_71_P101855                  | AK071964 | LOC_Os01g55750 | TCP family transcription factor containing protein             | 0.75 | 0.08 | 0.66 | 0.09 | 0.50 | 0.06 | 157.96 | 1.01 |
| A_71_P126137                  | AK072892 | LOC_Os12g39110 | zinc finger, C3HC4 type family protein                         | 0.74 | 0.06 | 0.72 | 0.12 | 0.47 | 0.05 | 165.31 | 1.09 |
| transport (up-regulated)      |          |                |                                                                |      |      |      |      |      |      |        |      |
| A_71_P105105                  | AK108711 | LOC_Os02g34580 | ammonium transporter 2                                         | 1.06 | 0.15 | 1.35 | 0.23 | 2.47 | 0.98 | 99.19  | 1.30 |
| A_71_P119764                  | AK065217 | LOC_Os08g03350 | LHT1                                                           | 1.19 | 0.12 | 1.36 | 0.41 | 2.46 | 0.39 | 105.66 | 1.30 |
| A_71_P117869                  | AK105311 | LOC_Os07g33780 | PDR-like ABC transporter                                       | 1.09 | 0.06 | 1.17 | 0.05 | 2.61 | 2.03 | 120.82 | 1.39 |
| A_71_P127448                  | AK108393 | LOC_Os05g27010 | peptide transporter PTR2                                       | 1.17 | 0.11 | 1.33 | 0.18 | 2.22 | 0.23 | 129.86 | 1.15 |
| A_71_P103242                  | AK063835 | LOC_Os01g45640 | tat pathway signal sequence family protein                     | 1.02 | 0.35 | 1.04 | 0.11 | 7.43 | 1.10 | 86.01  | 2.89 |
| A_71_P100920                  | AK103784 | LOC_Os01g31980 | transparent testa 12 protein                                   | 1.10 | 0.18 | 1.43 | 0.23 | 2.56 | 0.83 | 90.29  | 1.36 |
| transport (down-regulated)    |          |                |                                                                |      |      |      |      |      |      |        |      |
| A_71_P106018                  | AK100650 | LOC_Os02g44980 | amino acid transport protein                                   | 0.99 | 0.14 | 0.76 | 0.17 | 0.45 | 0.05 | 105.76 | 1.15 |
| A_71_P116013                  | AK107472 | LOC_Os06g12320 | amino acid/polyamine transporter II                            | 0.80 | 0.18 | 0.68 | 0.13 | 0.22 | 0.08 | 52.83  | 2.17 |
| A_71_P115705                  | AK072617 | LOC_Os06g03700 | oligopeptide transporter 9                                     | 0.87 | 0.08 | 0.84 | 0.10 | 0.24 | 0.07 | 79.21  | 2.04 |
| A_71_P104541                  | AK065840 | LOC_Os02g46460 | peptide transporter PTR2                                       | 0.74 | 0.28 | 0.57 | 0.26 | 0.29 | 0.11 | 47.76  | 1.77 |
| A_71_P122896                  | AK066937 | LOC_Os10g42900 | peptide transporter PTR2                                       | 0.77 | 0.09 | 0.73 | 0.05 | 0.49 | 0.08 | 187.04 | 1.02 |
| A_71_P114702                  | AK070558 | LOC_Os05g34010 | peptide transporter PTR2                                       | 0.90 | 0.04 | 0.77 | 0.08 | 0.48 | 0.09 | 142.11 | 1.06 |
| A_71_P102553                  | AK066793 | LOC_Os01g50616 | phosphatidylinositol transporter/ transporter                  | 0.75 | 0.10 | 0.68 | 0.07 | 0.44 | 0.02 | 114.02 | 1.18 |
| A_71_P119359                  | AK066067 | LOC_Os07g46780 | tyrosine-specific transport protein                            | 0.67 | 0.13 | 0.64 | 0.16 | 0.41 | 0.12 | 82.88  | 1.29 |
| A_71_P123937                  | AK111957 | LOC_Os10g38910 | ABC-type Co <sup>2+</sup> transport system, permease component | 0.91 | 0.05 | 0.73 | 0.06 | 0.44 | 0.05 | 108.67 | 1.19 |
| A_71_P115940                  | AK105826 | LOC_Os06g30730 | ATPase, coupled to transmembrane movement of substances        | 0.99 | 0.10 | 0.75 | 0.14 | 0.48 | 0.00 | 111.94 | 1.05 |
| A_71_P100064                  | AK065048 | LOC_Os01g17214 | carbohydrate transporter/ sugar porter/ transporter            | 0.86 | 0.49 | 0.63 | 0.11 | 0.22 | 0.11 | 52.97  | 2.16 |
| A_71_P123327                  | AK071193 | LOC_Os10g35140 | permeases of the drug/metabolite transporter                   | 0.82 | 0.01 | 0.68 | 0.01 | 0.50 | 0.00 | 142.34 | 1.01 |
| A_71_P104342                  | AK071338 | LOC_Os02g56510 | phosphate transporter 1                                        | 0.59 | 0.18 | 0.54 | 0.21 | 0.42 | 0.12 | 48.47  | 1.27 |
| A_71_P117558                  | AK067110 | LOC_Os06g29790 | phosphate transporter 1                                        | 0.55 | 0.07 | 0.48 | 0.03 | 0.27 | 0.05 | 19.82  | 1.90 |
| A_71_P112325                  | AK070018 | LOC_Os04g38026 | sugar transport protein 5                                      | 0.74 | 0.10 | 0.63 | 0.02 | 0.37 | 0.03 | 71.48  | 1.42 |
| A_71_P108667                  | AK067353 | LOC_Os03g09930 | sulfate transporter 2.1                                        | 0.53 | 0.17 | 0.39 | 0.09 | 0.10 | 0.03 | 14.91  | 3.36 |
| A_71_P112060                  | AK072809 | LOC_Os04g55800 | sulfate transporter 3.3                                        | 0.90 | 0.21 | 0.84 | 0.25 | 0.49 | 0.07 | 173.25 | 1.04 |
| A_71_P116372                  | AK063490 | LOC_Os06g36450 | transporter like protein                                       | 0.92 | 0.01 | 0.66 | 0.10 | 0.39 | 0.07 | 84.66  | 1.36 |
| no categorized (up-regulated) |          |                |                                                                |      |      |      |      |      |      |        |      |
| A_71_P112689                  | AK110400 | LOC_Os04g04330 | ATP binding protein                                            | 1.91 | 0.18 | 1.99 | 0.19 | 2.91 | 0.32 | 20.17  | 1.54 |
| A_71_P120258                  | AK059812 | LOC_Os08g13440 | germin-like protein subfamily 1 member 17 precursor            | 1.56 | 0.46 | 1.71 | 0.42 | 3.07 | 1.06 | 44.34  | 1.62 |
| A_71_P117553                  | AK062457 | LOC_Os06g21240 | glycine-rich cell wall structural protein precursor            | 1.56 | 0.21 | 1.70 | 0.11 | 2.19 | 0.12 | 93.84  | 1.13 |
| A_71_P115888                  | AK102441 | LOC_Os06g28124 | glycosyltransferase                                            | 1.06 | 0.42 | 1.16 | 0.36 | 2.20 | 0.45 | 145.19 | 1.14 |
| A_71_P117935                  | AK065663 | LOC_Os07g40870 | igA FC receptor precursor                                      | 1.23 | 0.13 | 1.50 | 0.14 | 3.11 | 1.45 | 67.89  | 1.64 |
| A_71_P117297                  | AK105605 | LOC_Os06g37150 | L-ascorbate oxidase precursor                                  | 1.05 | 0.13 | 1.60 | 0.50 | 2.78 | 0.63 | 76.27  | 1.48 |
| A_71_P124858                  | AK060544 | LOC_Os11g48060 | monocopper oxidase-like protein SKS1 precursor                 | 1.03 | 0.07 | 1.43 | 0.33 | 2.16 | 0.40 | 103.35 | 1.11 |
| A_71_P119888                  | AK059493 | LOC_Os08g37300 | mucin-2 precursor                                              | 1.22 | 0.11 | 1.58 | 0.40 | 3.51 | 0.95 | 58.13  | 1.81 |

|              |          |                |                                            |      |      |      |      |       |      |        |      |
|--------------|----------|----------------|--------------------------------------------|------|------|------|------|-------|------|--------|------|
| A_71_P119044 | AK068499 | LOC_Os07g46280 | non-cyanogenic beta-glucosidase precursor  | 1.15 | 0.07 | 1.25 | 0.08 | 2.43  | 0.34 | 121.92 | 1.28 |
| A_71_P110132 | AK100934 | LOC_Os03g15270 | prMC3                                      | 1.50 | 0.19 | 1.82 | 0.88 | 2.05  | 0.60 | 102.37 | 1.03 |
| A_71_P122990 | AK102387 | LOC_Os10g34840 | ripening-related protein 3 precursor       | 1.04 | 0.23 | 1.47 | 0.22 | 2.07  | 0.37 | 108.02 | 1.05 |
| A_71_P101334 | AK065307 | LOC_Os01g60860 | spotted leaf protein 11                    | 1.45 | 0.22 | 1.69 | 0.60 | 2.13  | 0.15 | 104.96 | 1.09 |
| A_71_P105023 | AK060001 | LOC_Os02g33550 | VAMP protein SEC22                         | 1.16 | 0.13 | 2.33 | 0.82 | 2.41  | 0.41 | 60.26  | 1.27 |
| A_71_P117663 | AK105945 | LOC_Os07g23660 | vegetative cell wall protein gp1 precursor | 1.07 | 0.19 | 1.14 | 0.04 | 2.63  | 2.10 | 123.98 | 1.39 |
| A_71_P100986 | AK062484 | LOC_Os01g11600 | conserved hypothetical protein             | 1.01 | 0.03 | 1.02 | 0.07 | 2.31  | 0.11 | 181.66 | 1.21 |
| A_71_P100058 | AK069098 | LOC_Os01g15270 | expressed protein                          | 1.23 | 0.38 | 1.61 | 1.47 | 3.93  | 0.76 | 52.31  | 1.98 |
| A_71_P123451 | AK062449 | LOC_Os10g41980 | expressed protein                          | 1.96 | 0.41 | 4.18 | 0.08 | 4.30  | 1.21 | 8.44   | 2.10 |
| A_71_P117445 | AK111637 | LOC_Os06g51260 | expressed protein                          | 1.01 | 0.10 | 1.08 | 0.19 | 3.57  | 0.36 | 102.30 | 1.84 |
| A_71_P125101 | AK062973 | LOC_Os11g30360 | expressed protein                          | 1.26 | 0.21 | 1.56 | 0.03 | 4.45  | 0.27 | 49.34  | 2.16 |
| A_71_P123076 | AK109893 | LOC_Os10g28680 | expressed protein                          | 1.07 | 0.16 | 1.12 | 0.19 | 2.00  | 0.54 | 49.34  | 1.00 |
| A_71_P102658 | AK059855 | LOC_Os01g51670 | expressed protein                          | 1.07 | 0.10 | 1.53 | 0.93 | 2.32  | 0.65 | 92.92  | 1.21 |
| A_71_P124040 | AK060177 | LOC_Os10g13850 | expressed protein                          | 1.96 | 0.83 | 2.04 | 0.50 | 8.81  | 3.07 | 15.90  | 3.14 |
| A_71_P116159 | AK061129 | LOC_Os06g39120 | expressed protein                          | 1.10 | 0.19 | 2.65 | 0.62 | 4.20  | 2.60 | 44.16  | 2.07 |
| A_71_P119228 | AK061478 | LOC_Os07g23120 | expressed protein                          | 1.32 | 0.52 | 1.45 | 0.45 | 2.52  | 0.43 | 92.74  | 1.33 |
| A_71_P123671 | AK062588 | LOC_Os10g36180 | expressed protein                          | 1.06 | 0.05 | 1.14 | 0.05 | 2.04  | 0.63 | 170.99 | 1.03 |
| A_71_P117548 | AK063903 | LOC_Os06g38660 | expressed protein                          | 1.03 | 0.11 | 1.30 | 0.39 | 6.22  | 0.37 | 63.89  | 2.64 |
| A_71_P103943 | AK069808 | LOC_Os01g69100 | expressed protein                          | 1.10 | 0.21 | 1.10 | 0.06 | 2.97  | 0.48 | 124.56 | 1.57 |
| A_71_P112699 | AK073181 | LOC_Os04g49370 | expressed protein                          | 1.55 | 0.52 | 1.64 | 0.62 | 2.90  | 1.52 | 51.96  | 1.54 |
| A_71_P110634 | AK107276 | LOC_Os03g51350 | expressed protein                          | 1.06 | 0.02 | 1.08 | 0.15 | 2.06  | 0.38 | 201.84 | 1.04 |
| A_71_P113609 | AK107732 | LOC_Os05g50100 | expressed protein                          | 1.05 | 0.16 | 1.44 | 0.53 | 3.46  | 2.00 | 73.05  | 1.79 |
| A_71_P111113 | AK109364 | LOC_Os04g39320 | expressed protein                          | 1.14 | 0.29 | 1.64 | 0.49 | 2.62  | 0.59 | 75.36  | 1.39 |
| A_71_P100719 | AK109646 | LOC_Os01g02010 | expressed protein                          | 1.10 | 0.15 | 1.40 | 0.36 | 2.87  | 0.32 | 83.21  | 1.52 |
| A_71_P114533 | AK111244 | LOC_Os05g11840 | expressed protein                          | 1.13 | 0.15 | 1.47 | 0.38 | 2.01  | 0.38 | 126.00 | 1.01 |
| A_71_P101669 | AK062919 | LOC_Os01g73024 | expressed protein                          | 1.05 | 0.11 | 1.14 | 0.08 | 2.09  | 1.07 | 160.44 | 1.07 |
| A_71_P118016 | AK062637 | LOC_Os07g09620 | expressed protein                          | 1.43 | 0.59 | 1.84 | 0.54 | 2.33  | 0.20 | 67.51  | 1.22 |
| A_71_P110628 | AK063718 | LOC_Os03g51470 | expressed protein                          | 1.05 | 0.07 | 1.07 | 0.11 | 2.02  | 0.39 | 212.15 | 1.02 |
| A_71_P125143 | AK065205 | LOC_Os11g30760 | expressed protein                          | 1.34 | 0.12 | 1.49 | 0.16 | 2.49  | 0.22 | 89.04  | 1.32 |
| A_71_P108905 | AK066091 | LOC_Os03g10320 | expressed protein                          | 1.15 | 0.34 | 2.05 | 0.74 | 6.84  | 0.93 | 39.64  | 2.77 |
| A_71_P126531 | AK108198 | LOC_Os12g05690 | expressed protein                          | 1.09 | 0.17 | 1.48 | 0.69 | 6.06  | 1.61 | 53.63  | 2.60 |
| A_71_P101372 | AK060800 | not recognized |                                            | 2.62 | 0.28 | 3.65 | 0.98 | 14.42 | 2.80 | 6.47   | 3.85 |
| A_71_P125678 | AK064494 | no hit         |                                            | 1.16 | 0.07 | 1.21 | 0.07 | 2.17  | 0.37 | 169.57 | 1.12 |
| A_71_P106932 | AK105148 | not recognized |                                            | 1.40 | 0.23 | 1.46 | 0.26 | 3.40  | 0.50 | 58.80  | 1.77 |
| A_71_P124017 | AK106038 | not recognized |                                            | 1.02 | 0.13 | 1.03 | 0.22 | 2.08  | 0.13 | 204.62 | 1.06 |
| A_71_P106253 | AK060705 | not recognized |                                            | 1.09 | 0.23 | 1.64 | 0.59 | 2.13  | 0.82 | 96.31  | 1.09 |
| A_71_P105425 | AK070083 | not recognized |                                            | 1.05 | 0.20 | 1.42 | 0.60 | 2.28  | 0.54 | 100.95 | 1.19 |
| A_71_P126644 | AK065433 | not recognized |                                            | 1.18 | 0.13 | 1.37 | 0.17 | 5.48  | 1.27 | 54.63  | 2.45 |
| A_71_P113466 | AK069868 | not recognized |                                            | 1.30 | 0.07 | 1.46 | 0.04 | 2.28  | 0.80 | 112.60 | 1.19 |
| A_71_P100291 | AK070443 | not recognized |                                            | 1.13 | 0.31 | 1.93 | 0.32 | 6.01  | 0.23 | 43.26  | 2.59 |
| A_71_P112511 | AK068417 | no hit         |                                            | 1.16 | 0.08 | 1.18 | 0.16 | 3.34  | 1.33 | 94.97  | 1.74 |

no categorized (down-regulated)

|              |          |                |                            |      |      |      |      |      |      |        |      |
|--------------|----------|----------------|----------------------------|------|------|------|------|------|------|--------|------|
| A_71_P102946 | AK072165 | LOC_Os01g51980 | alliin lyase precursor     | 0.95 | 0.08 | 0.80 | 0.27 | 0.22 | 0.04 | 71.77  | 2.20 |
| A_71_P105717 | AK100703 | LOC_Os02g34990 | amino acid binding protein | 0.80 | 0.04 | 0.75 | 0.06 | 0.43 | 0.04 | 126.67 | 1.22 |
| A_71_P107535 | AK099933 | LOC_Os03g47620 | ankyrin-1                  | 0.99 | 0.05 | 0.84 | 0.19 | 0.23 | 0.02 | 80.52  | 2.11 |
| A_71_P123898 | AK070579 | LOC_Os10g14870 | ATFP3                      | 0.76 | 0.12 | 0.74 | 0.04 | 0.36 | 0.05 | 91.89  | 1.46 |
| A_71_P108101 | AK065308 | LOC_Os03g60910 | ATP binding protein        | 0.75 | 0.02 | 0.69 | 0.07 | 0.48 | 0.11 | 151.21 | 1.06 |
| A_71_P121046 | AK111692 | LOC_Os08g15060 | ATP binding protein        | 0.92 | 0.16 | 0.90 | 0.12 | 0.38 | 0.05 | 138.58 | 1.39 |

|              |          |                |                                                                    |      |      |      |      |      |      |        |      |
|--------------|----------|----------------|--------------------------------------------------------------------|------|------|------|------|------|------|--------|------|
| A_71_P108751 | AK063906 | LOC_Os01g58000 | ATP synthase epsilon chain                                         | 0.80 | 0.32 | 0.79 | 0.23 | 0.47 | 0.09 | 189.17 | 1.09 |
| A_71_P108705 | AK099538 | LOC_Os03g01880 | carboxy-lyase                                                      | 0.70 | 0.12 | 0.59 | 0.06 | 0.40 | 0.04 | 67.76  | 1.33 |
| A_71_P106598 | AK066972 | LOC_Os02g19650 | catalytic/ hydrolase                                               | 0.66 | 0.07 | 0.65 | 0.05 | 0.30 | 0.03 | 51.07  | 1.73 |
| A_71_P126207 | AK071421 | LOC_Os12g18110 | cystinosin                                                         | 0.78 | 0.17 | 0.67 | 0.17 | 0.23 | 0.02 | 51.48  | 2.12 |
| A_71_P109730 | AK063239 | LOC_Os03g61360 | epoxide hydrolase 2                                                | 0.89 | 0.09 | 0.66 | 0.17 | 0.44 | 0.11 | 98.29  | 1.19 |
| A_71_P125307 | AK071093 | LOC_Os11g42800 | kinesin-like protein KIF3A                                         | 0.89 | 0.05 | 0.87 | 0.14 | 0.34 | 0.04 | 111.82 | 1.56 |
| A_71_P103020 | AK067493 | LOC_Os01g22980 | lysosomal protective protein precursor                             | 0.98 | 0.02 | 0.77 | 0.08 | 0.47 | 0.09 | 113.72 | 1.08 |
| A_71_P101016 | AK061954 | LOC_Os01g08510 | MAR binding filament-like protein 1                                | 0.89 | 0.20 | 0.88 | 0.15 | 0.37 | 0.08 | 128.24 | 1.45 |
| A_71_P102237 | AK103941 | LOC_Os01g61010 | nodulin-like protein                                               | 0.62 | 0.11 | 0.60 | 0.05 | 0.41 | 0.04 | 69.86  | 1.28 |
| A_71_P126283 | AK063610 | LOC_Os12g35340 | OsGrx_C11 - glutaredoxin subgroup III                              | 0.94 | 0.16 | 0.89 | 0.23 | 0.45 | 0.08 | 161.61 | 1.14 |
| A_71_P102810 | AK068523 | LOC_Os01g12710 | oxidoreductase                                                     | 0.79 | 0.14 | 0.60 | 0.08 | 0.44 | 0.02 | 86.25  | 1.19 |
| A_71_P111532 | AK068663 | LOC_Os04g46610 | PAP fibrillin family protein                                       | 0.88 | 0.10 | 0.73 | 0.08 | 0.50 | 0.14 | 143.00 | 1.01 |
| A_71_P111909 | AK069628 | LOC_Os04g43420 | peptidoglycan binding domain containing protein                    | 0.74 | 0.07 | 0.68 | 0.07 | 0.47 | 0.05 | 144.27 | 1.08 |
| A_71_P124116 | AK071673 | LOC_Os10g05230 | protein binding protein                                            | 0.69 | 0.05 | 0.66 | 0.05 | 0.47 | 0.03 | 149.78 | 1.08 |
| A_71_P102917 | AK065626 | LOC_Os01g49770 | protein binding protein                                            | 0.72 | 0.11 | 0.64 | 0.05 | 0.46 | 0.15 | 111.11 | 1.13 |
| A_71_P102441 | AK060416 | LOC_Os01g67120 | rhodanese-like domain containing protein                           | 0.91 | 0.05 | 0.83 | 0.06 | 0.35 | 0.05 | 104.10 | 1.51 |
| A_71_P113248 | AK061666 | LOC_Os04g33220 | SAM domain family protein                                          | 0.75 | 0.13 | 0.59 | 0.14 | 0.40 | 0.09 | 69.43  | 1.34 |
| A_71_P109620 | AK104998 | LOC_Os03g60240 | SCAR-like protein 1                                                | 0.80 | 0.13 | 0.79 | 0.12 | 0.46 | 0.12 | 171.61 | 1.12 |
| A_71_P102174 | AK058392 | LOC_Os01g42280 | selenium-binding protein-like                                      | 0.96 | 0.14 | 0.81 | 0.14 | 0.37 | 0.06 | 102.94 | 1.42 |
| A_71_P123068 | AK063553 | LOC_Os10g31930 | shugoshin-1                                                        | 0.95 | 0.06 | 0.91 | 0.04 | 0.49 | 0.04 | 187.60 | 1.02 |
| A_71_P111510 | AK064965 | LOC_Os04g02620 | steroid dehydrogenase let-767                                      | 0.95 | 0.30 | 0.86 | 0.15 | 0.35 | 0.03 | 109.24 | 1.49 |
| A_71_P117796 | AK061626 | LOC_Os07g28610 | thylakoid membrane phosphoprotein 14 kDa,<br>chloroplast precursor | 0.94 | 0.30 | 0.86 | 0.23 | 0.38 | 0.13 | 119.38 | 1.40 |
| A_71_P126352 | AK107649 | LOC_Os12g42280 | viviparous-14                                                      | 0.89 | 0.18 | 0.68 | 0.17 | 0.30 | 0.08 | 70.56  | 1.72 |
| A_71_P124448 | AK073222 | LOC_Os11g05400 | expressed protein                                                  | 0.77 | 0.18 | 0.65 | 0.21 | 0.49 | 0.18 | 135.99 | 1.03 |
| A_71_P123826 | AK108465 | LOC_Os10g34700 | expressed protein                                                  | 0.75 | 0.04 | 0.49 | 0.11 | 0.29 | 0.08 | 40.87  | 1.81 |
| A_71_P100590 | AK102103 | LOC_Os01g01890 | expressed protein                                                  | 0.87 | 0.05 | 0.67 | 0.10 | 0.29 | 0.09 | 65.35  | 1.78 |
| A_71_P116695 | AK107013 | LOC_Os06g33330 | expressed protein                                                  | 0.78 | 0.07 | 0.67 | 0.12 | 0.46 | 0.06 | 118.98 | 1.12 |
| A_71_P112379 | AK060198 | LOC_Os04g41150 | expressed protein                                                  | 0.99 | 0.22 | 0.81 | 0.21 | 0.50 | 0.19 | 122.08 | 1.01 |
| A_71_P106860 | AK072843 | LOC_Os02g07820 | expressed protein                                                  | 0.70 | 0.17 | 0.65 | 0.03 | 0.29 | 0.05 | 52.85  | 1.77 |
| A_71_P119311 | AK102726 | LOC_Os07g33270 | expressed protein                                                  | 0.85 | 0.42 | 0.68 | 0.45 | 0.48 | 0.42 | 120.82 | 1.07 |
| A_71_P125320 | AK099562 | LOC_Os11g26890 | expressed protein                                                  | 0.70 | 0.11 | 0.67 | 0.07 | 0.49 | 0.09 | 189.35 | 1.02 |
| A_71_P115554 | AK068804 | LOC_Os06g01790 | expressed protein                                                  | 0.90 | 0.14 | 0.77 | 0.11 | 0.39 | 0.10 | 102.16 | 1.38 |
| A_71_P103833 | AK067226 | LOC_Os01g61630 | expressed protein                                                  | 0.86 | 0.06 | 0.65 | 0.08 | 0.38 | 0.04 | 79.80  | 1.40 |
| A_71_P115207 | AK066568 | LOC_Os05g11064 | expressed protein                                                  | 0.86 | 0.16 | 0.71 | 0.16 | 0.40 | 0.18 | 95.79  | 1.33 |
| A_71_P118481 | AK100302 | LOC_Os07g42714 | expressed protein                                                  | 0.76 | 0.11 | 0.61 | 0.09 | 0.49 | 0.13 | 117.07 | 1.03 |
| A_71_P114807 | AK065362 | LOC_Os05g25400 | expressed protein                                                  | 0.78 | 0.08 | 0.66 | 0.05 | 0.26 | 0.01 | 54.51  | 1.93 |
| A_71_P103134 | AK059299 | LOC_Os01g64270 | expressed protein                                                  | 0.95 | 0.17 | 0.83 | 0.13 | 0.36 | 0.13 | 103.17 | 1.47 |
| A_71_P105785 | AK061270 | LOC_Os02g57030 | expressed protein                                                  | 0.99 | 0.13 | 0.81 | 0.23 | 0.48 | 0.11 | 121.74 | 1.06 |
| A_71_P105784 | AK061607 | LOC_Os02g57020 | expressed protein                                                  | 0.87 | 0.17 | 0.77 | 0.15 | 0.48 | 0.17 | 147.97 | 1.07 |
| A_71_P113838 | AK062488 | LOC_Os05g46470 | expressed protein                                                  | 0.75 | 0.07 | 0.74 | 0.02 | 0.15 | 0.04 | 45.07  | 2.75 |
| A_71_P103799 | AK064155 | LOC_Os01g47130 | expressed protein                                                  | 0.77 | 0.03 | 0.66 | 0.06 | 0.42 | 0.13 | 94.20  | 1.26 |
| A_71_P105814 | AK065700 | LOC_Os02g03670 | expressed protein                                                  | 0.78 | 0.11 | 0.65 | 0.09 | 0.31 | 0.13 | 60.92  | 1.71 |
| A_71_P118154 | AK067599 | LOC_Os07g38230 | expressed protein                                                  | 0.75 | 0.06 | 0.69 | 0.01 | 0.44 | 0.04 | 119.46 | 1.18 |
| A_71_P122416 | AK067677 | LOC_Os09g34140 | expressed protein                                                  | 0.89 | 0.19 | 0.79 | 0.09 | 0.39 | 0.26 | 109.65 | 1.35 |
| A_71_P103688 | AK067717 | LOC_Os01g70400 | expressed protein                                                  | 0.84 | 0.08 | 0.77 | 0.05 | 0.44 | 0.13 | 137.19 | 1.17 |
| A_71_P113677 | AK067770 | LOC_Os05g13860 | expressed protein                                                  | 0.78 | 0.16 | 0.75 | 0.24 | 0.48 | 0.14 | 185.22 | 1.05 |
| A_71_P106877 | AK068106 | LOC_Os02g45460 | expressed protein                                                  | 0.93 | 0.12 | 0.75 | 0.11 | 0.35 | 0.15 | 89.61  | 1.50 |

|              |          |                |                   |      |      |      |      |      |      |        |      |
|--------------|----------|----------------|-------------------|------|------|------|------|------|------|--------|------|
| A_71_P114716 | AK068507 | LOC_Os05g11260 | expressed protein | 0.75 | 0.31 | 0.72 | 0.24 | 0.33 | 0.16 | 74.68  | 1.60 |
| A_71_P124304 | AK072076 | LOC_Os11g34110 | expressed protein | 0.97 | 0.16 | 0.71 | 0.15 | 0.41 | 0.29 | 94.16  | 1.30 |
| A_71_P117052 | AK099578 | LOC_Os06g05950 | expressed protein | 0.75 | 0.06 | 0.64 | 0.08 | 0.39 | 0.09 | 76.12  | 1.37 |
| A_71_P111917 | AK105231 | LOC_Os04g53180 | expressed protein | 0.82 | 0.32 | 0.54 | 0.03 | 0.22 | 0.22 | 44.56  | 2.17 |
| A_71_P107530 | AK109220 | LOC_Os03g36960 | expressed protein | 0.92 | 0.15 | 0.78 | 0.15 | 0.45 | 0.11 | 124.84 | 1.16 |
| A_71_P114138 | AK110277 | LOC_Os05g42100 | expressed protein | 0.93 | 0.14 | 0.72 | 0.14 | 0.48 | 0.15 | 121.65 | 1.05 |
| A_71_P107316 | AK066912 | LOC_Os03g07360 | expressed protein | 0.93 | 0.20 | 0.78 | 0.07 | 0.44 | 0.06 | 118.37 | 1.18 |
| A_71_P107483 | AK059899 | LOC_Os03g57349 | expressed protein | 0.76 | 0.12 | 0.63 | 0.11 | 0.49 | 0.12 | 126.95 | 1.04 |
| A_71_P124007 | AK062627 | LOC_Os10g07450 | expressed protein | 0.58 | 0.09 | 0.50 | 0.05 | 0.42 | 0.09 | 39.53  | 1.24 |
| A_71_P109121 | AK063139 | LOC_Os03g22519 | expressed protein | 0.84 | 0.13 | 0.74 | 0.19 | 0.49 | 0.07 | 158.15 | 1.03 |
| A_71_P108384 | AK063832 | LOC_Os03g55770 | expressed protein | 0.53 | 0.03 | 0.45 | 0.02 | 0.19 | 0.02 | 16.20  | 2.42 |
| A_71_P125815 | AK109421 | LOC_Os12g25180 | expressed protein | 0.75 | 0.09 | 0.69 | 0.17 | 0.39 | 0.07 | 88.56  | 1.37 |
| A_71_P112638 | AK058861 | no hit         |                   | 0.77 | 0.07 | 0.72 | 0.03 | 0.48 | 0.08 | 167.58 | 1.05 |
| A_71_P128042 | AK110284 | not recognized |                   | 0.95 | 0.06 | 0.79 | 0.17 | 0.47 | 0.09 | 129.14 | 1.08 |
| A_71_P125261 | AK069449 | not recognized |                   | 0.93 | 0.42 | 0.62 | 0.01 | 0.31 | 0.03 | 68.10  | 1.68 |
| A_71_P126642 | AK068287 | no hit         |                   | 0.73 | 0.16 | 0.68 | 0.12 | 0.50 | 0.13 | 181.33 | 1.01 |
| A_71_P116868 | AK111859 | not recognized |                   | 0.66 | 0.10 | 0.65 | 0.06 | 0.45 | 0.09 | 120.51 | 1.15 |
| A_71_P108341 | AK102717 | not recognized |                   | 0.73 | 0.06 | 0.65 | 0.10 | 0.50 | 0.06 | 156.05 | 1.01 |

<sup>a</sup>Descriptions of each gene were annotated according to the TIGR database (<http://www.tigr.org/tdb/e2k1/osa1/>). Cu-responsive genes were also roughly classified into functional categories based partly on Gene Ontology Classification (<http://www.geneontology.org/>).

<sup>b,c</sup>Values are means and S.E. of fold-change (F) calculated from triplicate data from different leaves.

<sup>d,e</sup>Values are Cu sensitivities estimated from median effective concentrations for F (EC50<sub>F</sub>), and the amplitude of expression change with the 130 μM treatment ( $|\log_2 F|_{130}$ ). EC50<sub>F</sub>s were calculated by probit analysis (Finney, 1978).
